# Supplementary material
Source: MDPI journal article supplement (https://www.mdpi.com/2673-8104/3/2/17)
Supplement: s1 [file s1]

## Supplementary Material

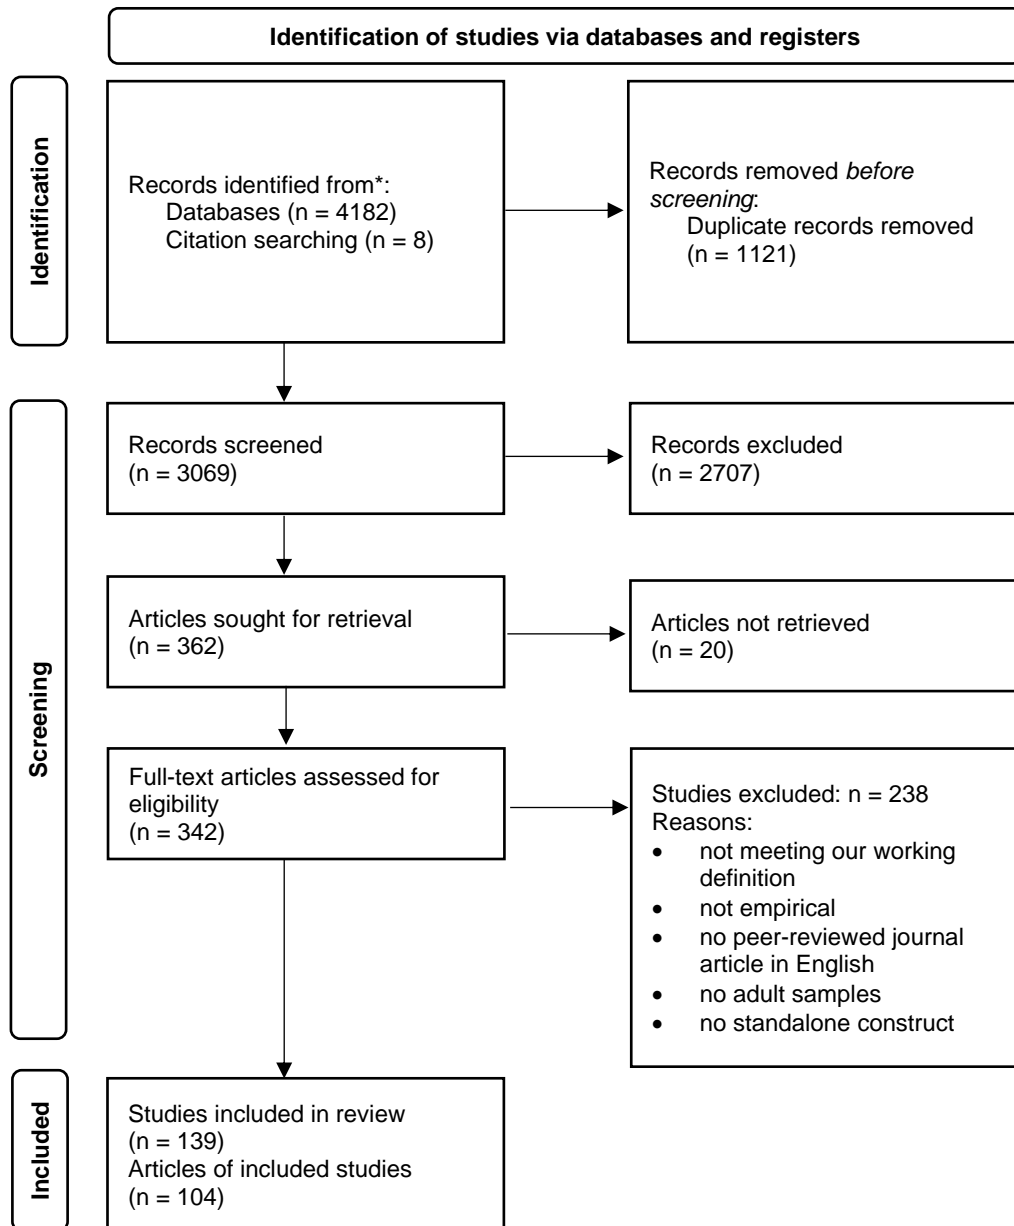

Figure S1. PRISMA Flow Diagram. The number of articles and studies varies due to several multi-study articles, of which some studies of the same articles may have (not) met our inclusion criteria.
